# Supplementary material
Source: MDPI journal article supplement (https://www.mdpi.com/2313-0105/9/10/512)
Supplement: s1 [file s1 › batteries-2652310-supplementary.pdf]

## Supplementary Materials

# Rheological and Electrochemical Properties of Biodegradable Chia Mucilage Gel Electrolyte Applied to Supercapacitor

Inkyum Kim <sup>1</sup>, Su Thiri San <sup>1</sup>, Avinash C. Mendhe <sup>2</sup>, Suprimkumar D. Dhas <sup>2</sup>, Seung-Bae Jeon<sup>3,\*</sup> and Daewon Kim <sup>2,\*</sup>

<sup>1</sup> Department of Electronics and Information Convergence Engineering, Kyung Hee University, 1732 Deogyeong-daero, Giheung-gu, Yongin 17104, Republic of Korea; inkyum.kim@khu.ac.kr

<sup>2</sup> Department of Electronic Engineering, Kyung Hee University, 1732 Deogyeong-daero, Giheung-gu, Yongin 17104, Republic of Korea; avinashm2893@khu.ac.kr

<sup>3</sup> Department of Electronic Engineering, Hanbat National University, 125 Dongseo-daero, Yuseong-gu, Daejeon 34158, Republic of Korea

\* Correspondence: sbjeon@hanbat.ac.kr (S.-B.J.); daewon@khu.ac.kr (D.K.)

# **Table of contents**

- 1. Digital camera images of chis mucilage gel after 2 and 3 days**
- 2. Images for activated carbon electrode**
- 3. Magnified Nyquist plot for the fabricated supercapacitor after stability test**

## 1. Digital camera images of chis mucilage gel after 2 and 3 days

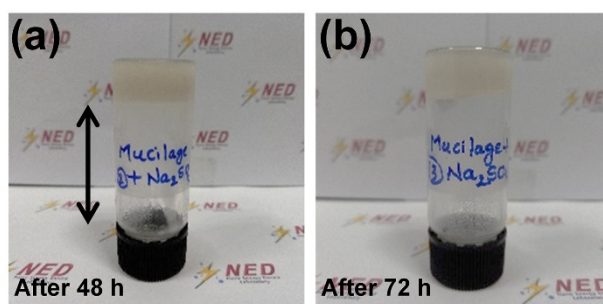

**Figure S1.** Digital camera images for showing fluidic property of the chia mucilage gel after (a) 48 h and (b) 72 h.

## 2. Images for activated carbon electrode

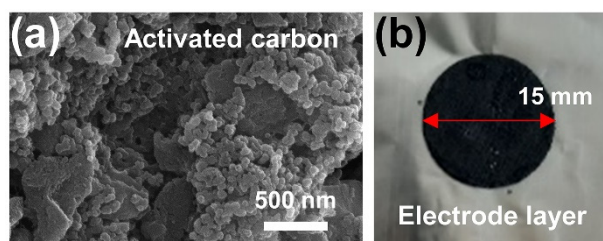

**Figure S2.** (a) SEM image of the activated carbon electrode surface. (b) Digital camera image of the activated carbon electrode.

### 3. Magnified Nyquist plot for the fabricated supercapacitor after stability test

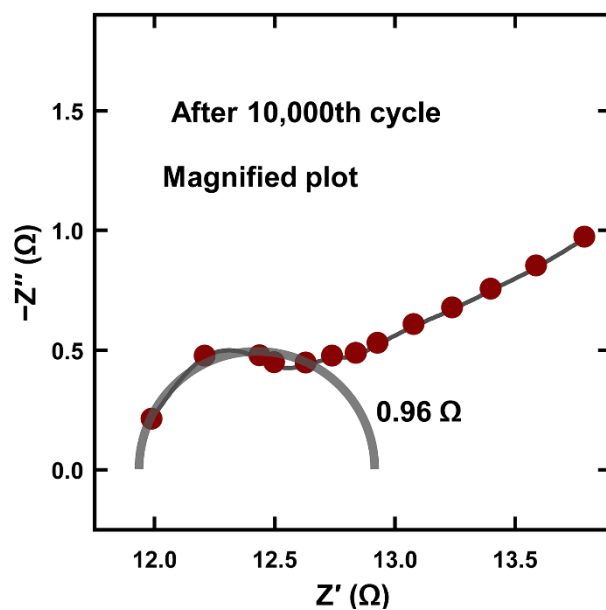

**Figure S3.** Magnified Nyquist plot for the fabricated chia mucilage gel electrolyte based electric double layer capacitor (EDLC) at the high-frequency region after 10,000 cycles of charging/discharging.
